# Supplementary material for: Prediction of trans-antisense transcripts in Arabidopsis thaliana
Source: PubMed Central journal article supplement (PMC1794575; doi:10.1186/gb-2006-7-10-r92), 2006-10-13
Supplement: gb-2006-7-10-r92-S3.pdf [file gb-2006-7-10-r92-S3.pdf]

Additional data file 3. Phylogentic tree of UDP-glucosyl transferase family proteins involved in antisense pairs.

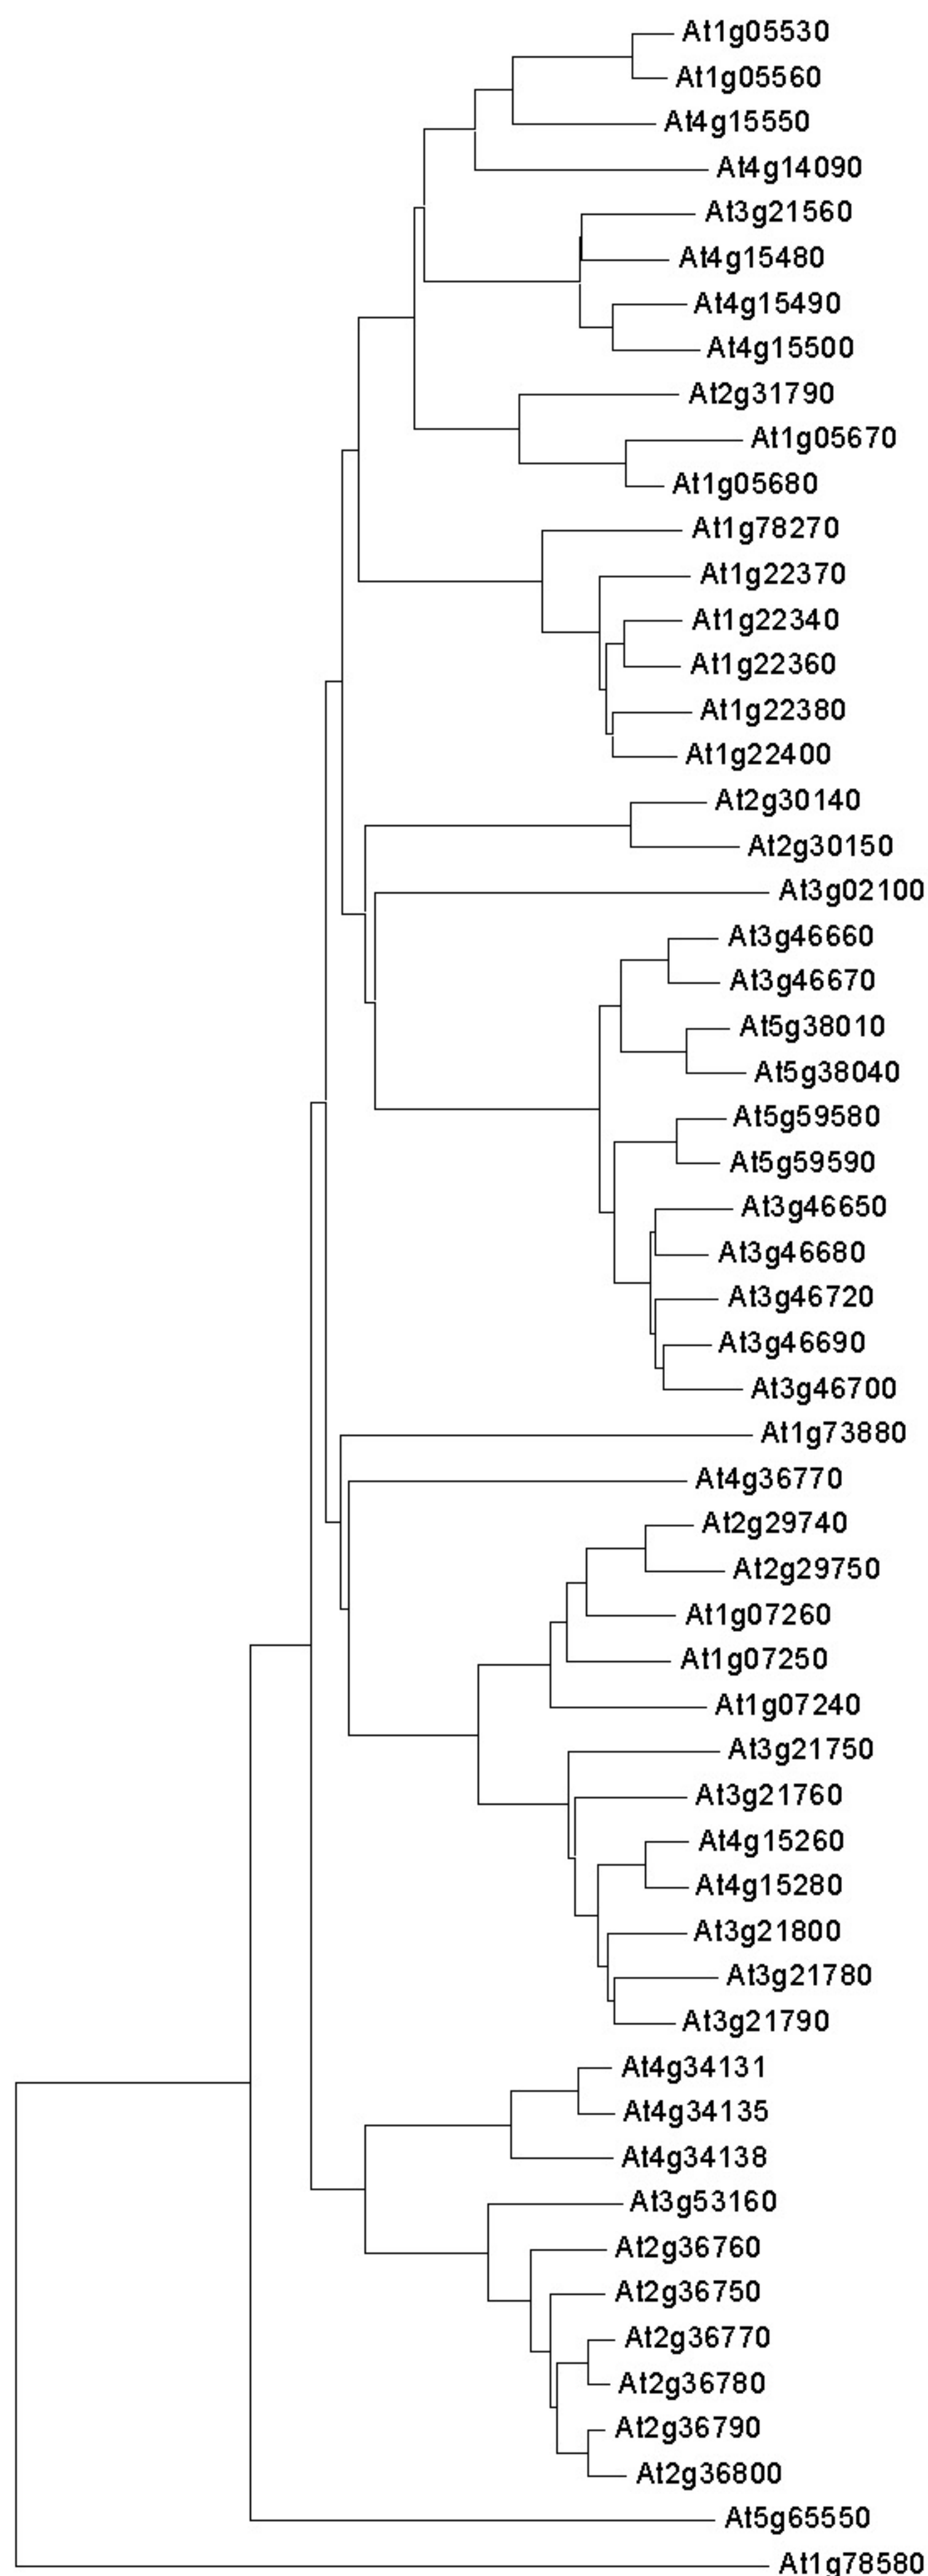

0.2
